# Supplementary material for: An ultrasensitive SERS sensing chip for the serum screening of psychiatric disorders
Source: Royal Society of Chemistry journal article supplement (doi:10.1039/d3tc03688j), 2023-12-14
Supplement: d3tc03688j1.pdf [file d3tc03688j1.pdf]

**Table S11.** The sequences of DNA.

|                                |                                                                                                                                  |
|--------------------------------|----------------------------------------------------------------------------------------------------------------------------------|
| Serotonin aptamer              | 5' SH-CGA CTG GTA GGC AGA TAG GGG AAG CTG ATT CGA<br>TGC GTG GGT CG-3'                                                           |
| Serotonin<br>complementary DNA | 5'-CGA CCC ACG CAT CGA ATC AGC TTC CCC TAT CTG CCT<br>ACC<br>AGT CG-SH 3'                                                        |
| Dopamine aptamer               | 5'-GTC TCT GTG TGC GCC AGA GAA CAC TGG GGC AGA TAT<br>GGG CCA GCA CAG AAT GAG GCC C-SH 3'                                        |
| Dopamine<br>complementary DNA  | 5' SH-GGG CCT CAT TCT GTG CTG GCC CAT ATC TGC CCC AGT<br>GTT CTC TGG CGC ACA CAG AGA C-3'                                        |
| Cortisol aptamer               | 5' SH-GGA ATG GAT CCA CAT CCA TGG ATG GGC AAT GCG<br>GGG TGG AGA ATG GTT GCC GCA CTT CGG CTT CAC TGC AGA<br>CTT GAC GAA GCT T-3' |
| Cortisol<br>complementary DNA  | 5'-AAG CTT CGT CAA GTC TGC AGT GAA GCC GAA GTG CGG<br>CAA CCA TTC TCC ACC CCG CAT TGC CCA TCC ATG GAT GTG<br>GAT CCA TTC C-SH 3' |
